# Supplementary material
Source: Springer Nature journal article supplement (https://www.springermedizin.de/resource/supplementary/12888_2013_1542_MOESM4_ESM.pdf/9481318)

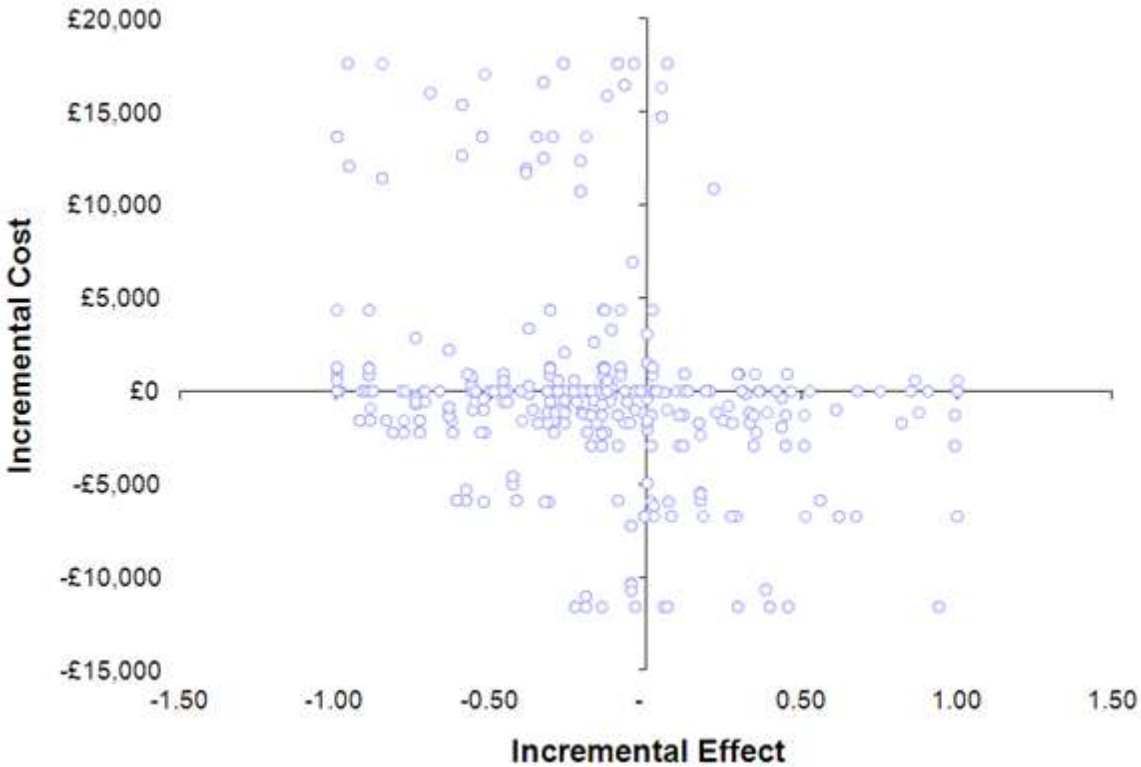

Supplement: MOESM4 [file 9481318]
